# Supplementary material for: Evidence of non-stoichiometry effects in nanometric manganite perovskites: influence on the magnetic ordering temperature
Source: Royal Society of Chemistry journal article supplement (doi:10.1039/c1jm12137e), 2011-01-01
Supplement: c1jm12137e.pdf [file c1jm12137e.pdf]

# **Evidence of non-stoichiometry effects in nanometric manganite perovskites : influence on the magnetic ordering temperature**

**Romain Epherre,<sup>a</sup> Cinta Pepin,<sup>a</sup> Nicolas Penin,<sup>a</sup> Etienne Duguet,<sup>a</sup> Stéphane Mornet,<sup>a</sup> Emil Pollert<sup>b</sup> and Graziella Goglio<sup>\*a</sup>**

***Supplementary data***

**Table S1** : Structural parameters and reliability factors deduced from Rietveld refinement of XRD patterns for  $\text{La}_{1-x}\text{Sr}_x\text{MnO}_{3+\delta}$  with  $x = 0, 0.10, 0.20, 0.35$  and  $0.40$ . Occupancies were fixed with respect of chemical compositions (deduced from ICP and redox titration experiments).

| $x_{\text{théo}}$            | <b>0</b>                               | <b>0.1</b>           | <b>0.2</b>  | <b>0.35</b> | <b>0.4</b>  |             |
|------------------------------|----------------------------------------|----------------------|-------------|-------------|-------------|-------------|
| <b>a (Å)</b>                 | 5.508(1)                               | 5.507(1)             | 5.504(1)    | 5.488(2)    | 5.477(2)    |             |
| <b>c (Å)</b>                 | 13.342(3)                              | 13.351(2)            | 13.366(2)   | 13.375(4)   | 13.381(9)   |             |
| <b>v (Å<sup>3</sup>)</b>     | 350.5(1)                               | 350.1(1)             | 350.7(1)    | 348.8(2)    | 347.6(3)    |             |
| <b>La/Sr</b>                 | <b>Wyckoff site</b>                    | <b>6a (0, 0, ¼)</b>  |             |             |             |             |
|                              | <b>Occ.</b>                            | 0.99                 | 0.86 / 0.10 | 0.78 / 0.19 | 0.64 / 0.35 | 0.59 / 0.40 |
|                              | <b>B<sub>iso</sub> (Å<sup>2</sup>)</b> | 0.35(9)              | 0.22(8)     | 0.07(6)     | 0.02(8)     | 0.00(8)     |
| <b>Mn</b>                    | <b>Wyckoff site</b>                    | <b>6b (0, 0, 0)</b>  |             |             |             |             |
|                              | <b>Occ.</b>                            | 0.94                 | 0.96        | 0.97        | 0.99        | 0.99        |
|                              | <b>B<sub>iso</sub> (Å<sup>2</sup>)</b> | 1.0                  |             |             |             |             |
| <b>O</b>                     | <b>Wyckoff site</b>                    | <b>18e (x, 0, ¼)</b> |             |             |             |             |
|                              | <b>x</b>                               | 0.458(5)             | 0.458(3)    | 0.461(4)    | 0.467(4)    | 0.476(5)    |
|                              | <b>Occ.</b>                            | 1.0                  |             |             |             |             |
|                              | <b>B<sub>iso</sub> (Å<sup>2</sup>)</b> | 1.0                  |             |             |             |             |
| <b>cRp (%)</b>               | 22.3                                   | 16.0                 | 14.6        | 18.5        | 17.6        |             |
| <b>cRwp (%)</b>              | 15.5                                   | 13.6                 | 12.5        | 13.1        | 12.7        |             |
| <b>R<sub>exp</sub> (%)</b>   | 12.4                                   | 10.4                 | 10.1        | 11.1        | 11.5        |             |
| <b>R<sub>Bragg</sub> (%)</b> | 8.7                                    | 7.7                  | 6.1         | 6.7         | 5.6         |             |
| <b>χ<sup>2</sup></b>         | 1.59                                   | 1.74                 | 1.54        | 1.38        | 1.22        |             |

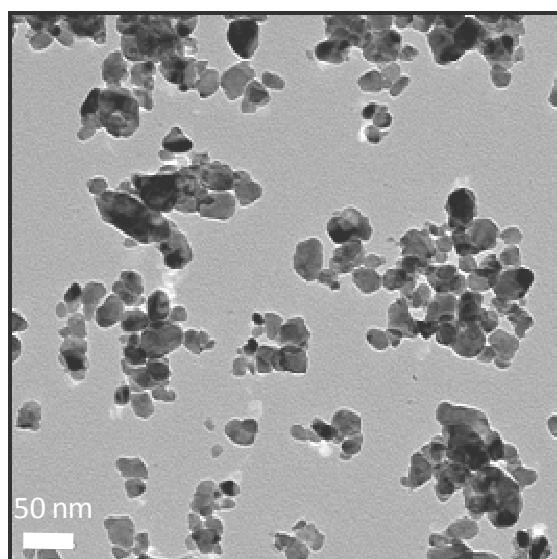

**Figure S1** : TEM image of unaggregated manganite nanoparticles ( $x=0.18$ )

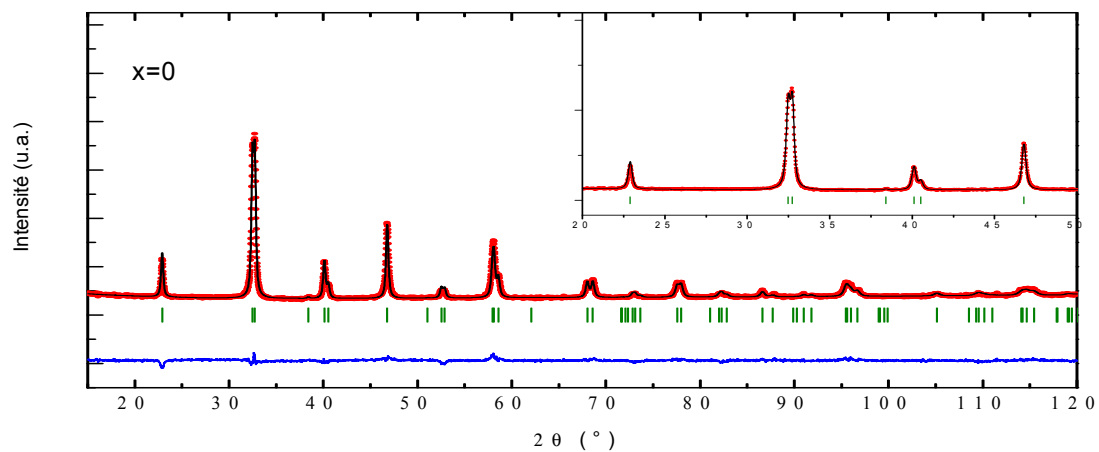

**Figure S2** : Observed (red dots), calculated (black solid line), and difference (bottom, blue) X-ray powder diffraction patterns for  $\text{La}_{1-x}\text{Sr}_x\text{MnO}_{3+\delta}$  with  $x = 0$ . A zoom in the 20-50° theta range is presented in the inset.

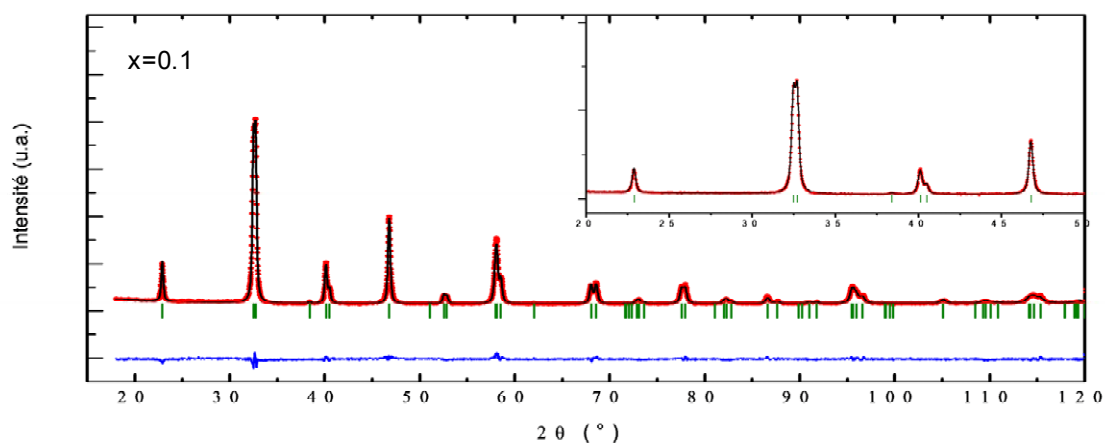

**Figure S3** : Observed (red dots), calculated (black solid line), and difference (bottom, blue) X-ray powder diffraction patterns for  $\text{La}_{1-x}\text{Sr}_x\text{MnO}_{3+\delta}$  with  $x = 0.1$ . A zoom in the  $20\text{-}50^\circ$  theta range is presented in the inset.

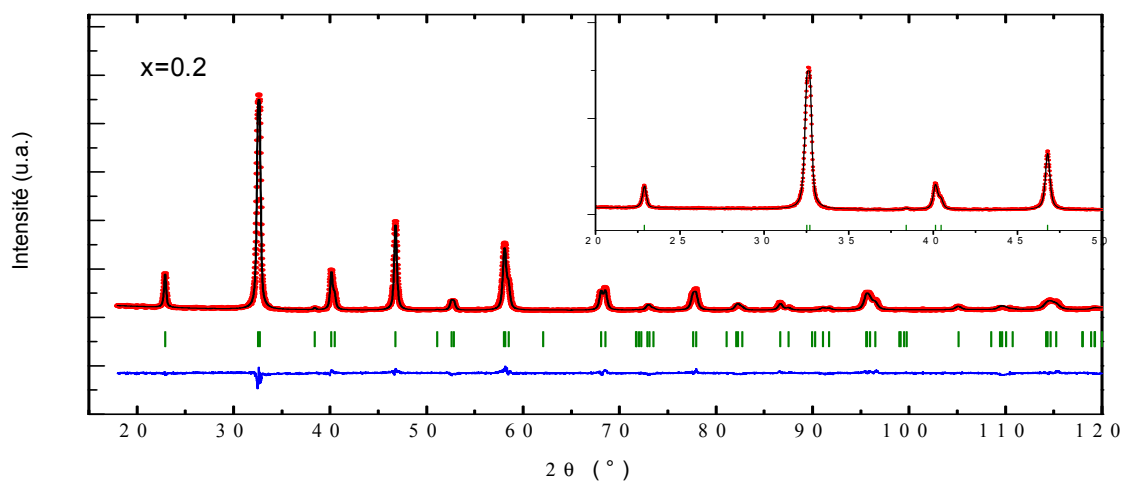

**Figure S4** : Observed (red dots), calculated (black solid line), and difference (bottom, blue) X-ray powder diffraction patterns for  $\text{La}_{1-x}\text{Sr}_x\text{MnO}_{3+\delta}$  with  $x = 0.2$ . A zoom in the  $20\text{-}50^\circ$  theta range is presented in the inset.

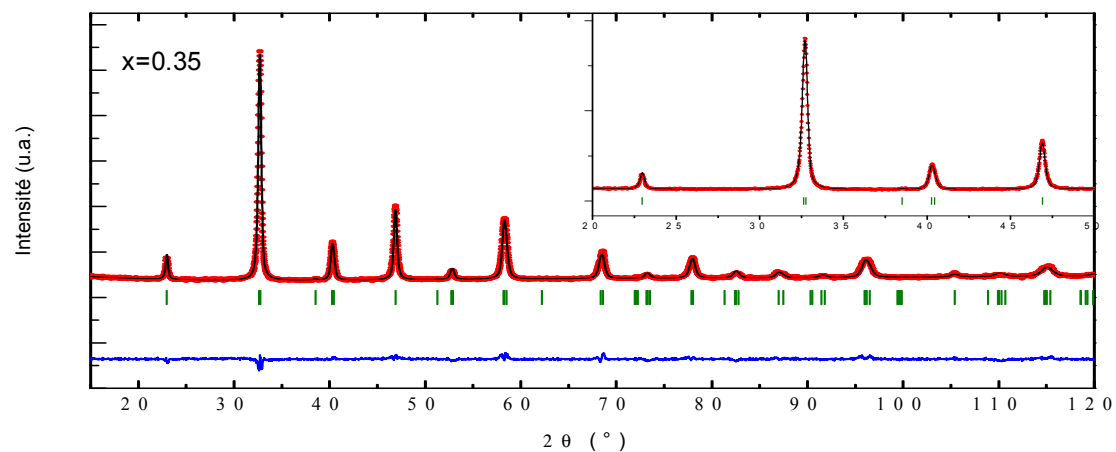

**Figure S5** : Observed (red dots), calculated (black solid line), and difference (bottom, blue) X-ray powder diffraction patterns for  $\text{La}_{1-x}\text{Sr}_x\text{MnO}_{3+\delta}$  with  $x = 0.35$ . A zoom in the  $20\text{-}50^\circ$  theta range is presented in the inset.

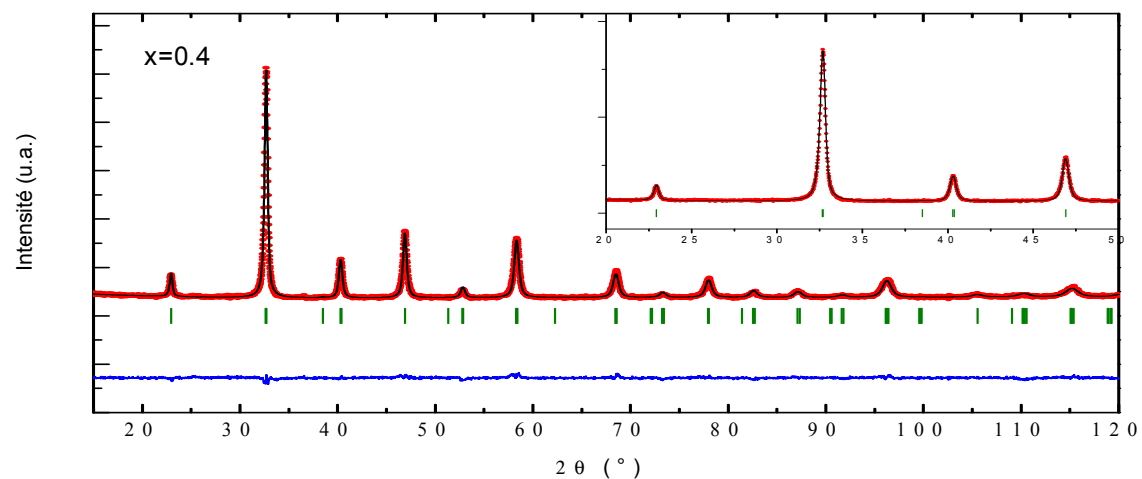

**Figure S6** : Observed (red dots), calculated (black solid line), and difference (bottom, blue) X-ray powder diffraction patterns for  $\text{La}_{1-x}\text{Sr}_x\text{MnO}_{3+\delta}$  with  $x = 0.4$ . A zoom in the  $20\text{-}50^\circ$  theta range is presented in the inset.

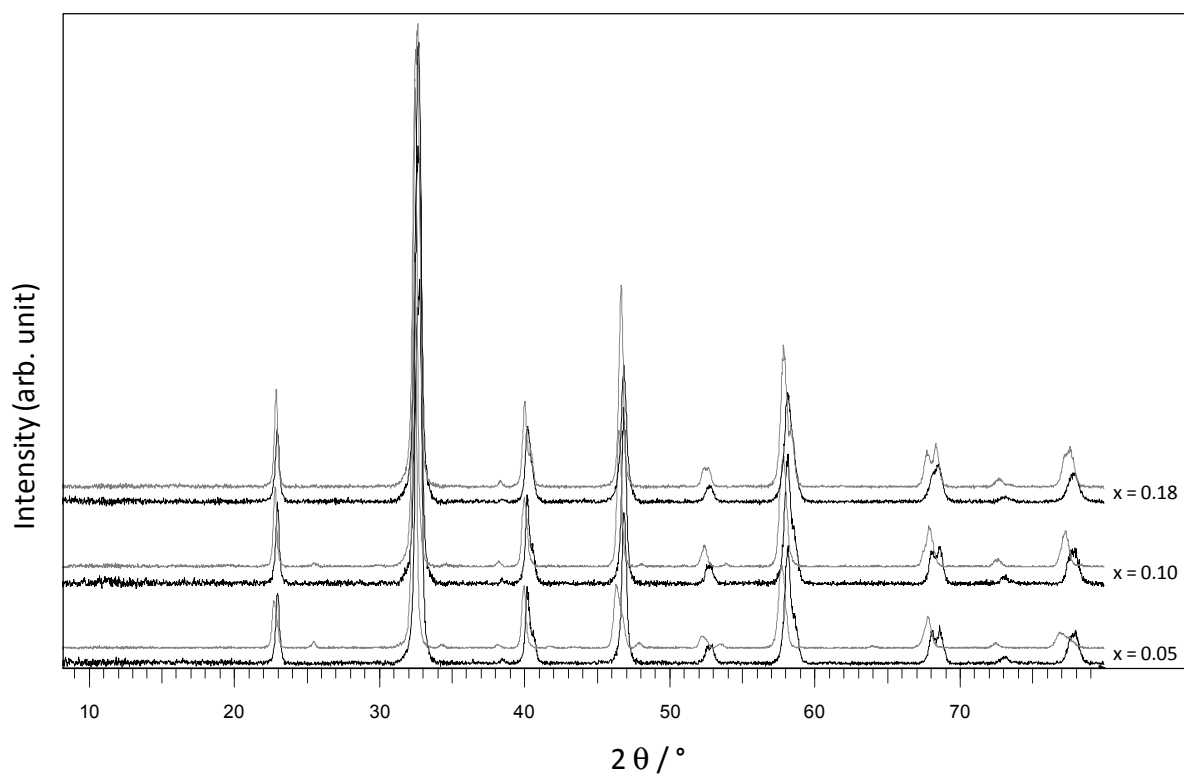

**Figure S7** : XRD patterns of raw (grey) and reduced (black)  $\text{La}_{1-x}\text{Sr}_x\text{MnO}_{3+\delta}$  samples with  $x$  equal to 0.05, 0.10 and 0.18.
